# Supplementary material for: Hydrogen evolution at polarised liquid/liquid interfaces catalyzed by molybdenum disulfide
Source: Royal Society of Chemistry journal article supplement (doi:10.1039/c1ee01996a), 2011-01-01
Supplement: c1ee01996a.pdf [file c1ee01996a.pdf]

*Electronic supplementary information*

**Hydrogen evolution at polarised liquid/liquid interfaces catalyzed by  
molybdenum disulfide**

Imren Hatay<sup>‡a</sup>, Pei Yu Ge<sup>a</sup>, Heron Vrubel<sup>c</sup>, Xile Hu<sup>c</sup> and Hubert H. Girault<sup>\*a</sup>

<sup>a</sup>Laboratoire d'Electrochimie Physique et Analytique, Station 6, Ecole Polytechnique Fédérale de Lausanne, Lausanne, Swizerland

<sup>b</sup>Laboratory of Inorganic Synthesis and Catalysis, Ecole Polytechnique Fédérale de Lausanne, Lausanne Switzerland.

<sup>‡</sup>*Present address:* Selcuk University, Department of Chemistry, 42031, Konya, Turkey.

**Keywords:** Hydrogen evolution, Molybdenum disulfide (MoS<sub>2</sub>), Liquid/liquid interface, Decamethyferrocene

\*To whom correspondence should be addressed:

Fax:(+41216933667

E-mail: [hubert.girault@epfl.ch](mailto:hubert.girault@epfl.ch)

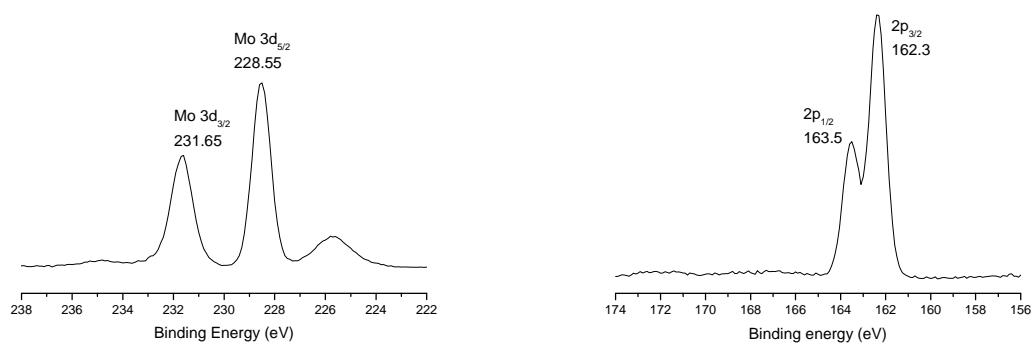

**Fig.SI-1.** XPS spectra of Mo 3d (left) and S 2p levels (right)

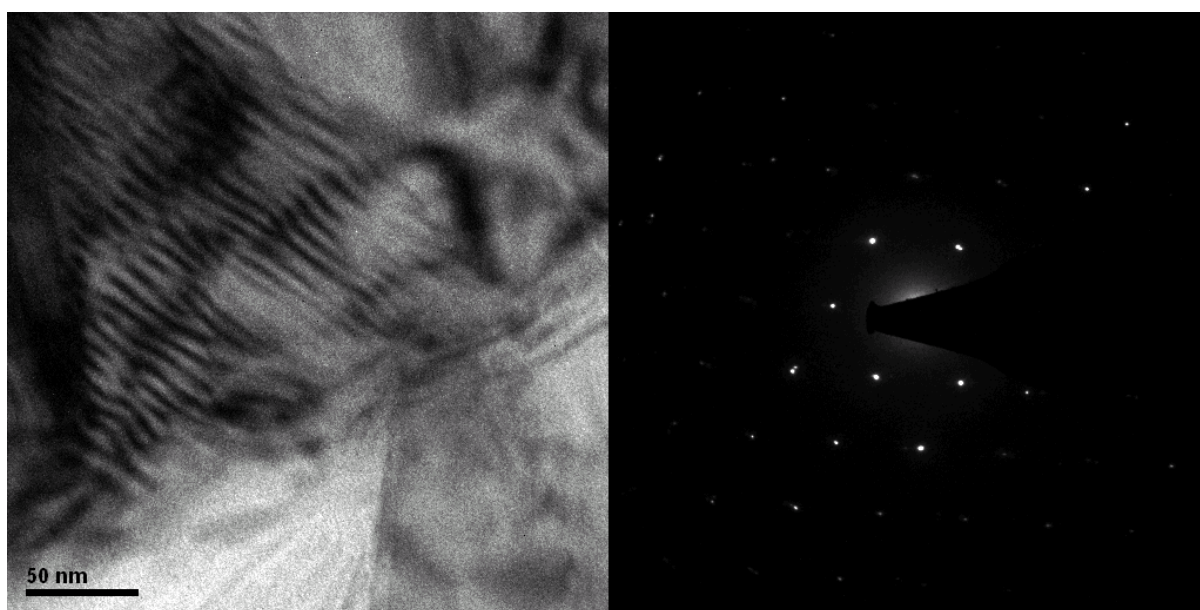

**Fig.SI-2.** TEM (left) and electron diffraction images (right) for the commercial MoS<sub>2</sub> used.

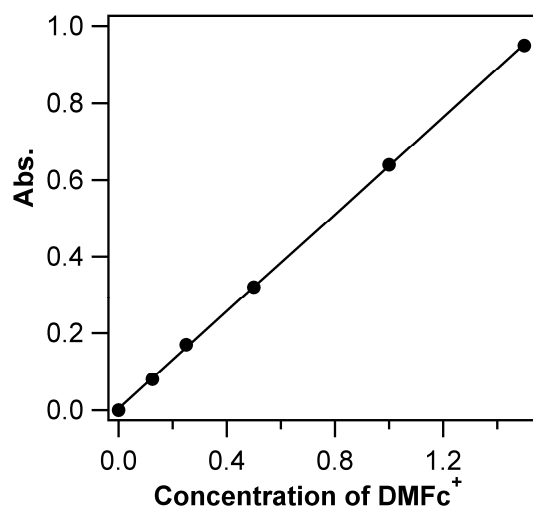

**Fig. SI-3:** The calibration curve is obtained by plotting of absorbance against the different concentrations of DMFc<sup>+</sup> solution. The value obtained at 779 nm was  $\varepsilon = 0.632 \text{ mM}^{-1} \cdot \text{cm}^{-1}$

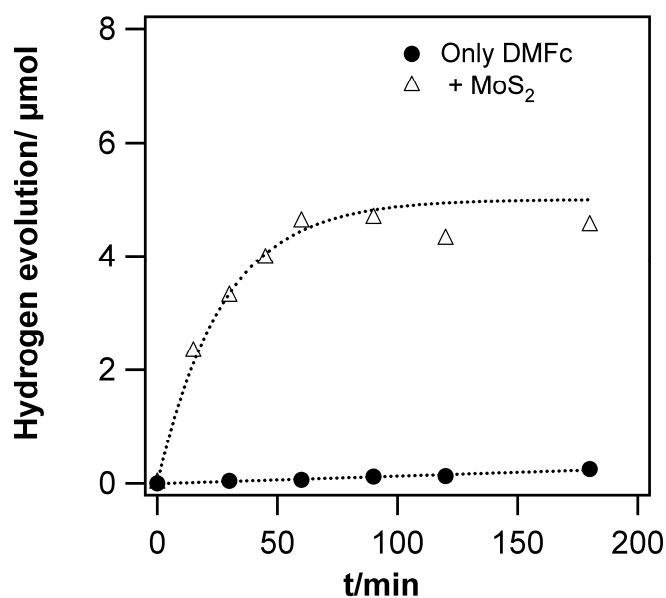

**Figure SI-4:** Fitting curves obtained by analysis of the gas chromatograms in Figure 5.
